# Supplementary material for: Multi-sample non-negative spatial factorization
Source: PubMed Central journal article supplement — bioRxiv. 2024 Jul 1:2024.07.01.599554. Preprint. [Version 1] doi: 10.1101/2024.07.01.599554 (PMC11244884; doi:10.1101/2024.07.01.599554), 2024-07-01
Supplement: NIHPP2024.07.01.599554v1-supplement-1.pdf [file NIHPP2024.07.01.599554v1-supplement-1.pdf]

# SUPPLEMENTARY MATERIALS

---

## Multi-sample non-negative spatial factorization

Yi Wang, Kyla Woysner, Chaichontat Sriworarat, Genevieve Stein-O'Brien, Loyal A Goff,  
Kasper D. Hansen

### Contents

|                                        |   |
|----------------------------------------|---|
| <a href="#">1 Supplemental Tables</a>  | 2 |
| <a href="#">2 Supplemental Figures</a> | 3 |

## 1 Supplemental Tables

| Factor | Gene symbol                                                                       |
|--------|-----------------------------------------------------------------------------------|
| M1     | Tcf7l2, Bc1, Acta2, Slc17a6, Dcn, Trh, Tnnt1, Cabp7, Atp2a3, Ccn2                 |
| M2     | Ttr, Enpp2, Ecrg4                                                                 |
| M3     |                                                                                   |
| M4     | 2010300C02Rik, Arpp21, Ppp3ca, Cx3cl1, Lamp5, Rgs4, Chst1, Pdp1, Ndr4, Kcnp2      |
| M5     | Hba-a1, Hbb-bs, Hba-a2, Hbb-bt, Alas2                                             |
| M6     | mt-Co1, mt-Nd5, mt-Co2, mt-Atp8, mt-Nd2, mt-Nd4, mt-Atp6, mt-Nd4l, mt-Co3, mt-Nd3 |
| M7     | Lypd1, Ly6h, Pgrmc1, Hap1, Lmo3, Gap43, Ccn3, Crym, Atp2b4, Ahi1                  |
| M8     | Vxn, Stx1a, Lingo1, Dkk3, Tbr1, Cck, Mef2c, Nrn1, 1110008P14Rik, Slc30a3          |
| M9     | Pcp2, Car8, Cbln1, Rgs8, Calb1, Itpr1, Cbln3, Gng13, Zic1, Inpp5a                 |
| M10    | Penk, Gpr88, Ppp1r1b, Pde10a, Tac1, Pde1b, Rgs9, Adcy5, Scn4b, Rasd2              |
| M11    | Scg2, Nap1l5, Resp18, Tuba1b, Gnas                                                |
| M12    | Prkcd, Adarb1, Nefm, Cplx1, Slc24a2, Rasgrp1, Uchl1, Thy1, Atp1a3                 |
| M13    | Tmsb10, Fxyd6, Rpl37, Rplp1, Rpl13, Rpl9, Rps19, Rps27, Rpl37a, Clu               |
| M14    | Ptgds, Mgp, Igf2, Myoc, Nnat, Igfbp2                                              |
| M15    | Plp1, Mobp, Mbp, Trf, Mag, Mal, Cldn11, Cryab, Cnp, Mog                           |
| M16    | Fabp7, S100a5, Slc6a11, Ptn, Apoe, Nrsn1, Aqp4, Vtn, Sparcl1, Pla2g7              |
| M17    | Cnih2, Ddn, Ptk2b, Nptxr, Ncdn, Nsmf, Nell2, Mmd, Thra, Selenow                   |
| M18    | Sst, Npy, Gad1, Gad2, Slc32a1, Zwint, Pcsk1n, Cox8a, Snrpn, Cox6c                 |
| M19    | Gng4, Synpr, Gpsm1, Pcbp3, Meis2, Cpne4, Ptpro, Tshz1, Pbx3, Pcp4l1               |
| M20    | Gm42418, Lars2, Nefh, Vamp1, Spp1, Malat1, Neffl, Nat8l                           |

**Supplementary Table S1. Genes mostly associated with each factor in mouse sagittal section data |**

| Factor | Gene symbol                                                          |
|--------|----------------------------------------------------------------------|
| M1     | COX1, COX2, COX3, ND4, ATP6, ND2, ND3, CYTB, ND1, ND5                |
| M2     | KRT8, KRT18, S100A11, MOG, MOBP, HSPA2, BCAS1, IGFBP5, MBP, PAQR6    |
| M3     | FABP4, SAA1, AQP4, SNORC, CXCL14, VIM, SPARC, GJA1, GFAP, MT2A       |
| M4     | PPP3CA, DIRAS2, AK5, APP, THY1, PRKCB, CHN1, YWHAG, RTN4, PRNP       |
| M5     | PLP1, TF, CNP, CARNS1, HBA2, HBB, CLDND1, CLDN11, ENPP2, PPP1R14A    |
| M6     | HPCAL1                                                               |
| M7     | NEFM, NEFL, SNCG, LGALS1, GAP43                                      |
| M8     | PCP4, SNCA, TUBB2A, TMSB10, SYT1, STMN2, STMN1, UCHL1, FABP3, TTC9B  |
| M9     | COX6C, SST, NPY                                                      |
| M10    | SCGB2A2, SCGB1D2, TFF1, IGKC, IGHG3, AZGP1, IGHG4, TFF3, MUC1, IGLC2 |

**Supplementary Table S2. Genes associated with each factor in the DLPC data |**

## 2 Supplemental Figures

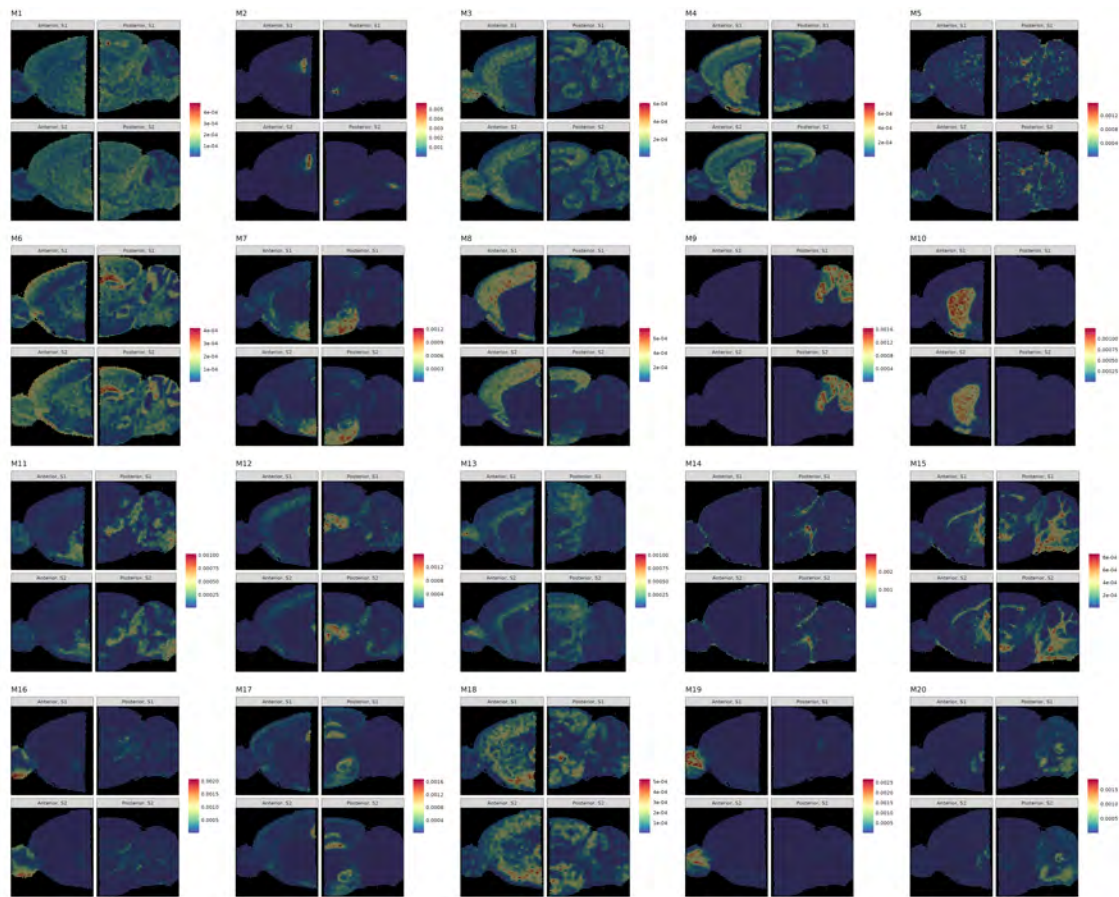

**Supplementary Figure S1. mNSF factors of mouse sagittal data show associations with the anatomical structure** | The dataset is composed of four samples – two pairs of replicates, each for the anterior and the posterior region. Four-sample NSF is applied in this data, with twelve factors used. Each pair of replicates is in the same column in each subplot. Comparing the spatial pattern of each factor to a reference diagram of the mouse brain, it is easy to establish that factor 16 and 19 are enriched in olfactory bulb, and factor 9 is enriched in cerebellum.

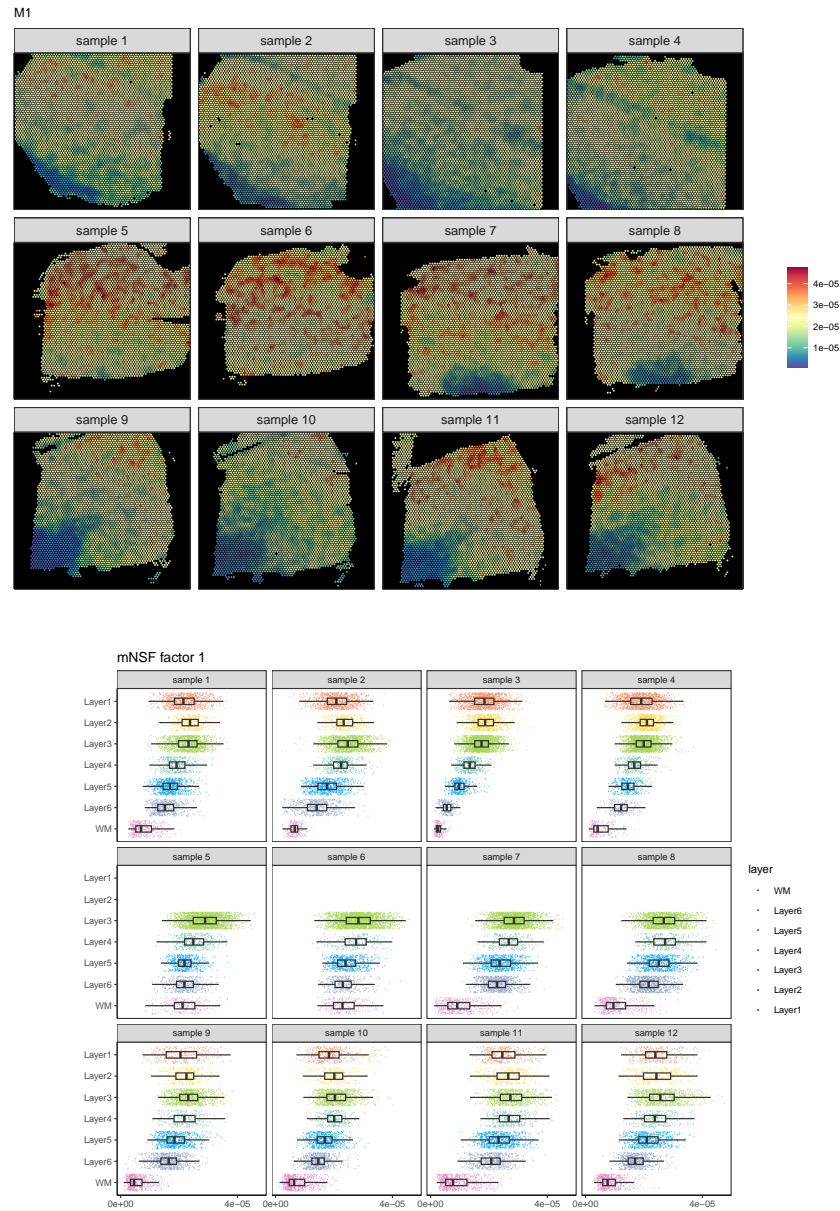

**Supplementary Figure S2. The value of each mNSF factor M1 for each of the 12 samples in DLPFC data**



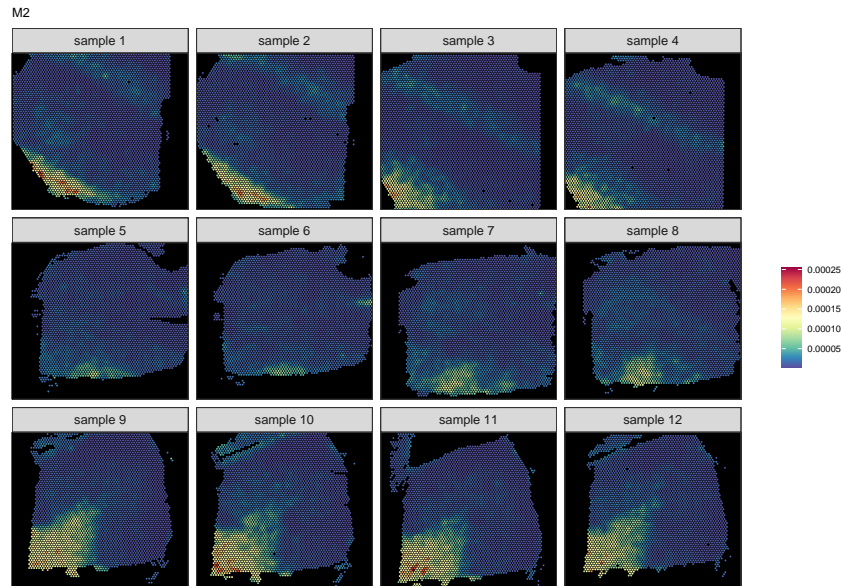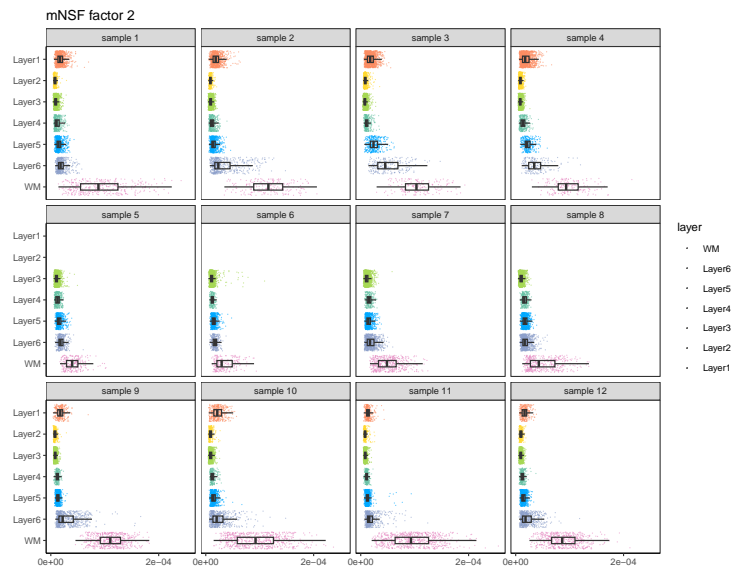

**Supplementary Figure S3. The value of each mNSF factor M2 for each of the 12 samples in DLPFC data**

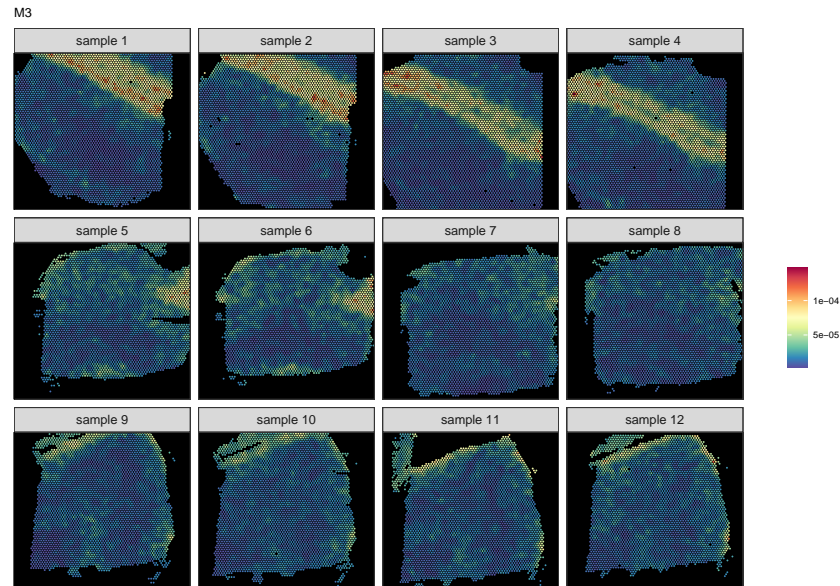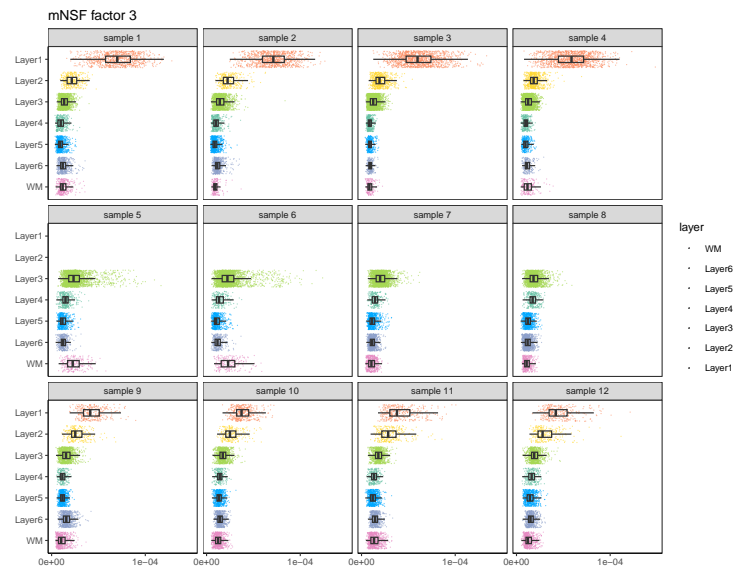

**Supplementary Figure S4. The value of each mNSF factor M3 for each of the 12 samples in DLPFC data**

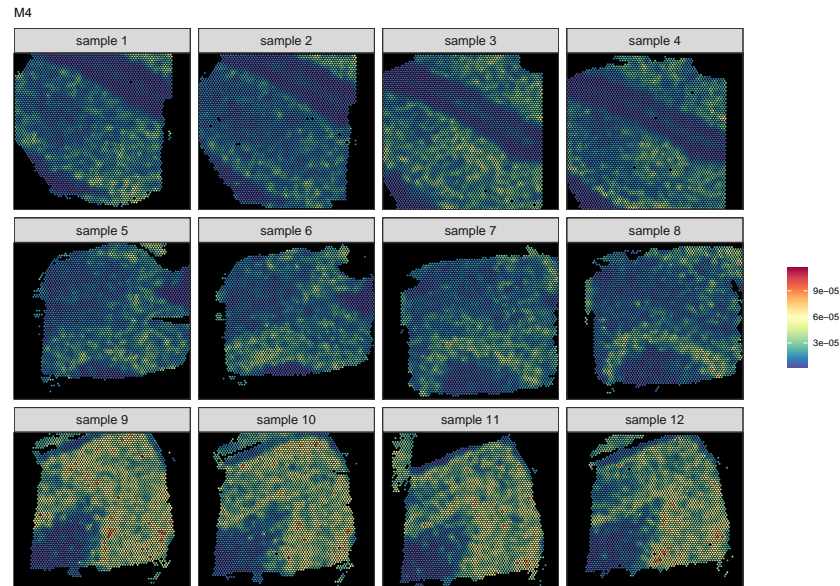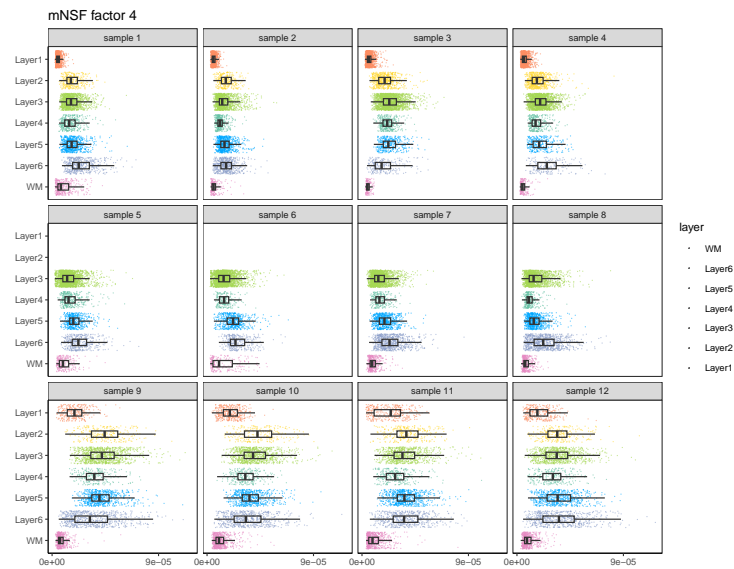

**Supplementary Figure S5. The value of each mNSF factor M4 for each of the 12 samples in DLPFC data**

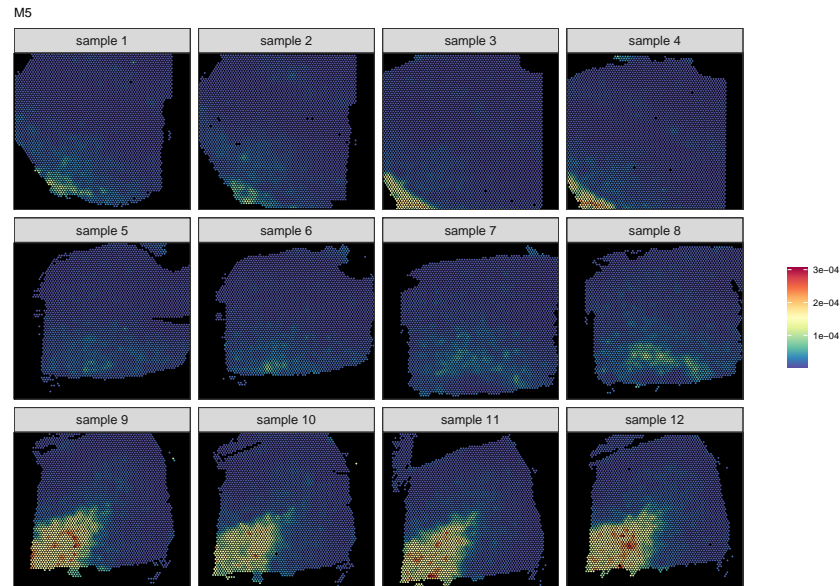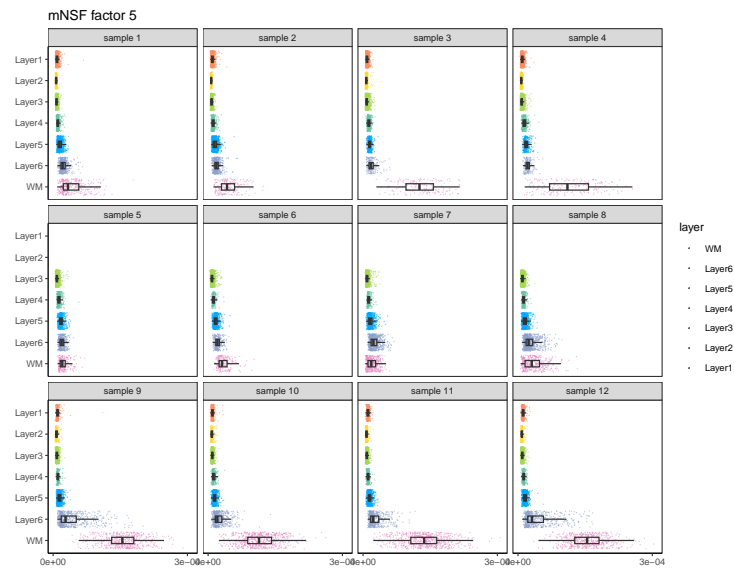

**Supplementary Figure S6. The value of each mNSF factor M5 for each of the 12 samples in DLPFC data**



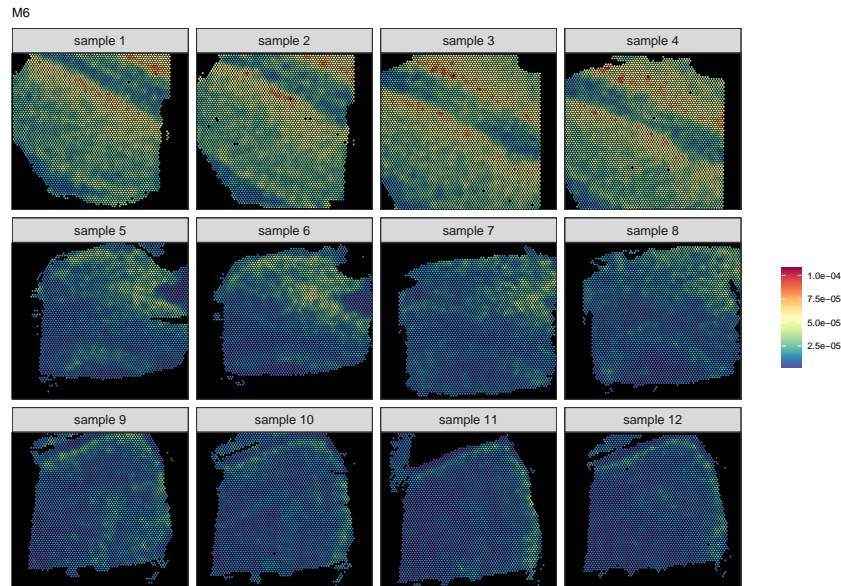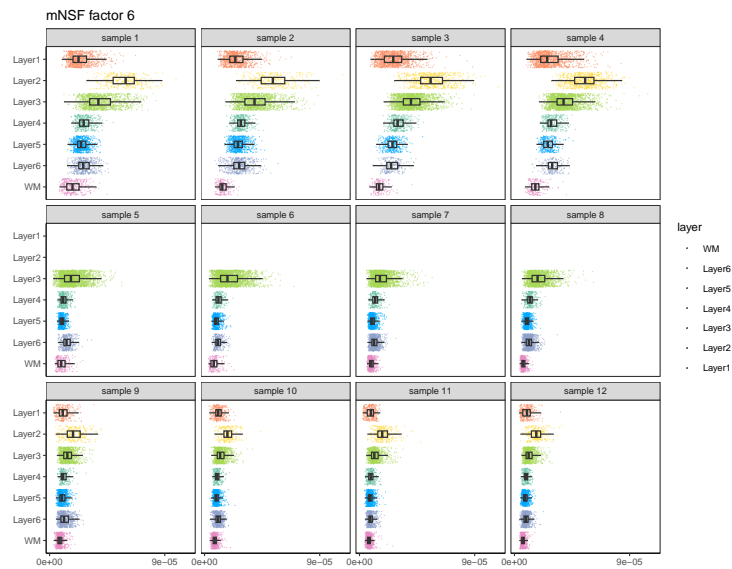

**Supplementary Figure S7. The value of each mNSF factor M6 for each of the 12 samples in DLPFC data**



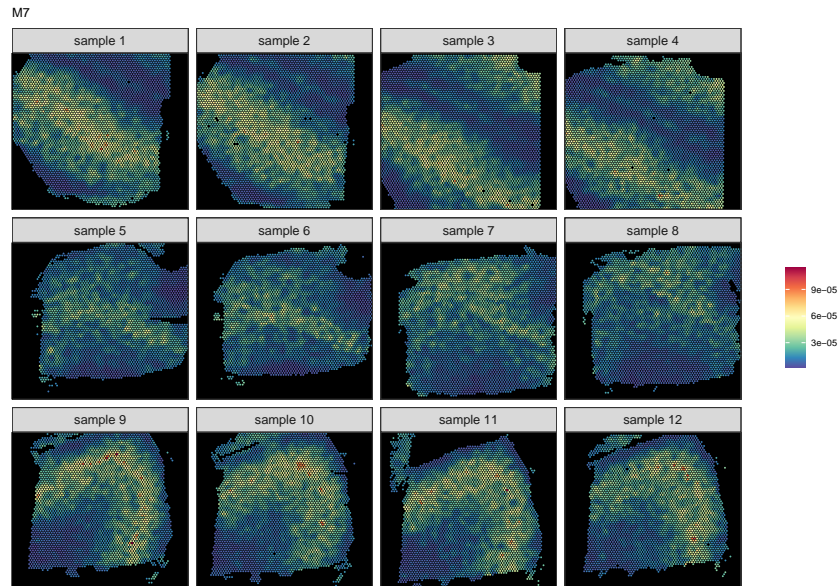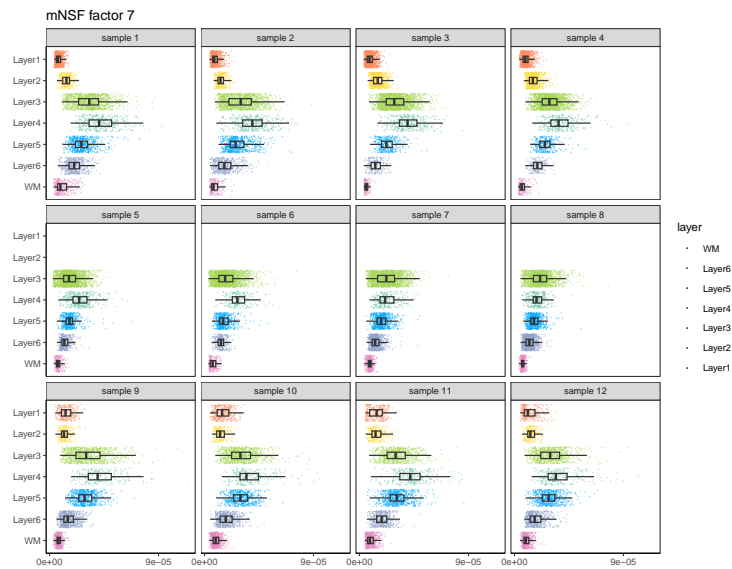

**Supplementary Figure S8. The value of each mNSF factor M7 for each of the 12 samples in DLPFC data**

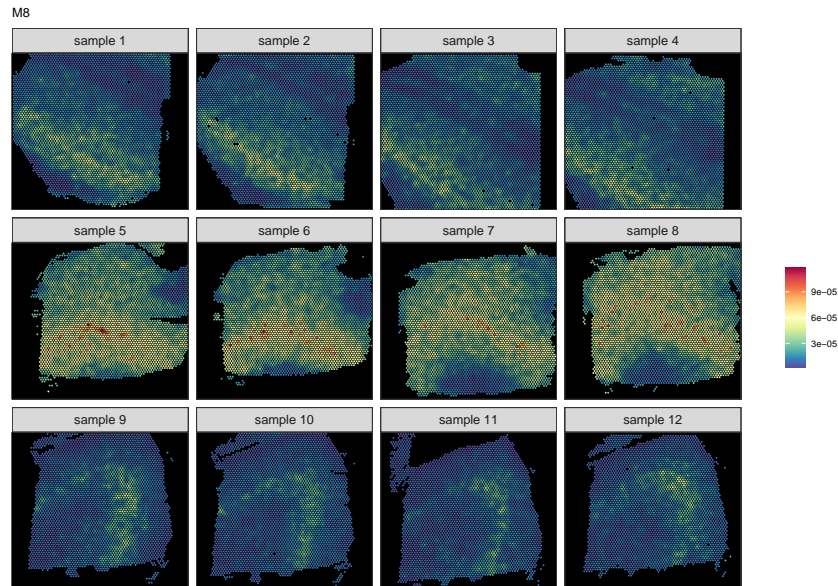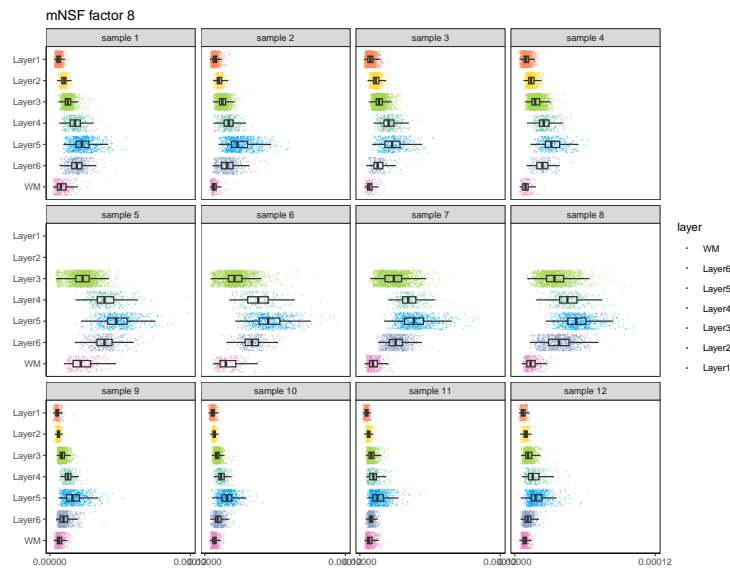

**Supplementary Figure S9.** The value of each mNSF factor M8 for each of the 12 samples in DLPFC data

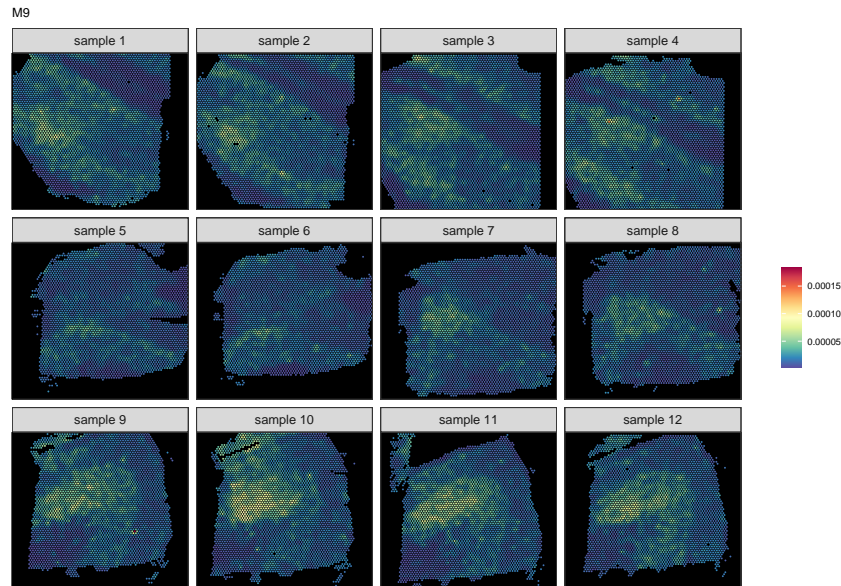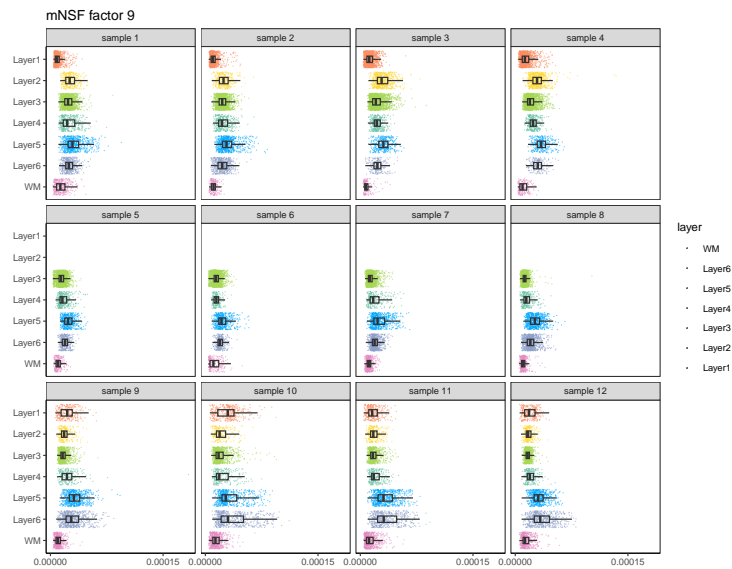

**Supplementary Figure S10. The value of each mNSF factor M9 for each of the 12 samples in DLPFC data**

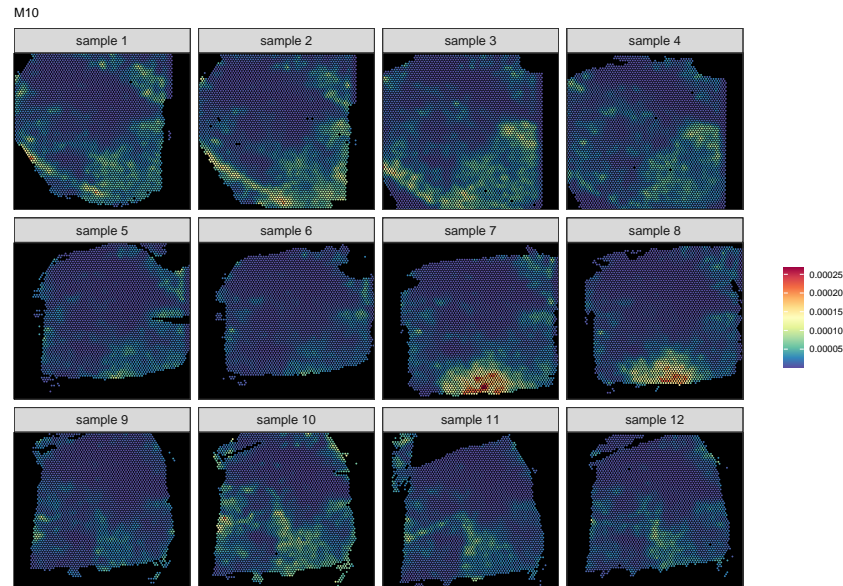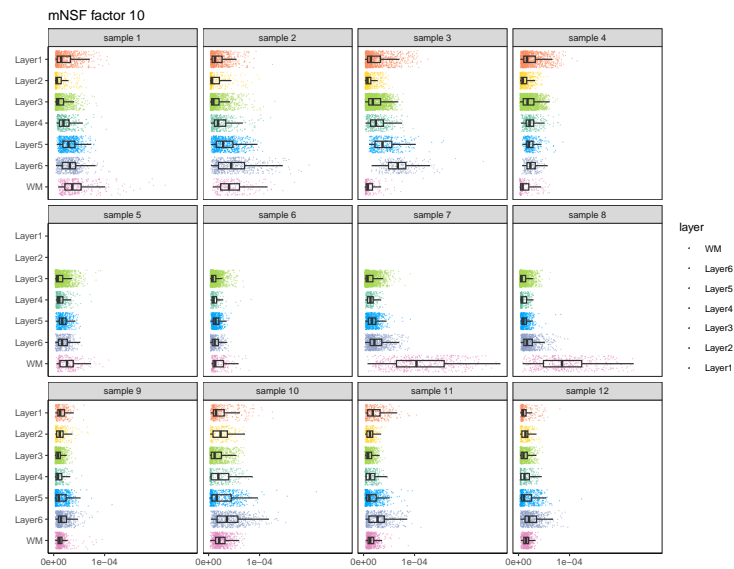

**Supplementary Figure S11. The value of each mNSF factor M10 for each of the 12 samples in DLPFC data**
